# Supplementary material
Source: PubMed Central journal article supplement (PMC1978103)

A

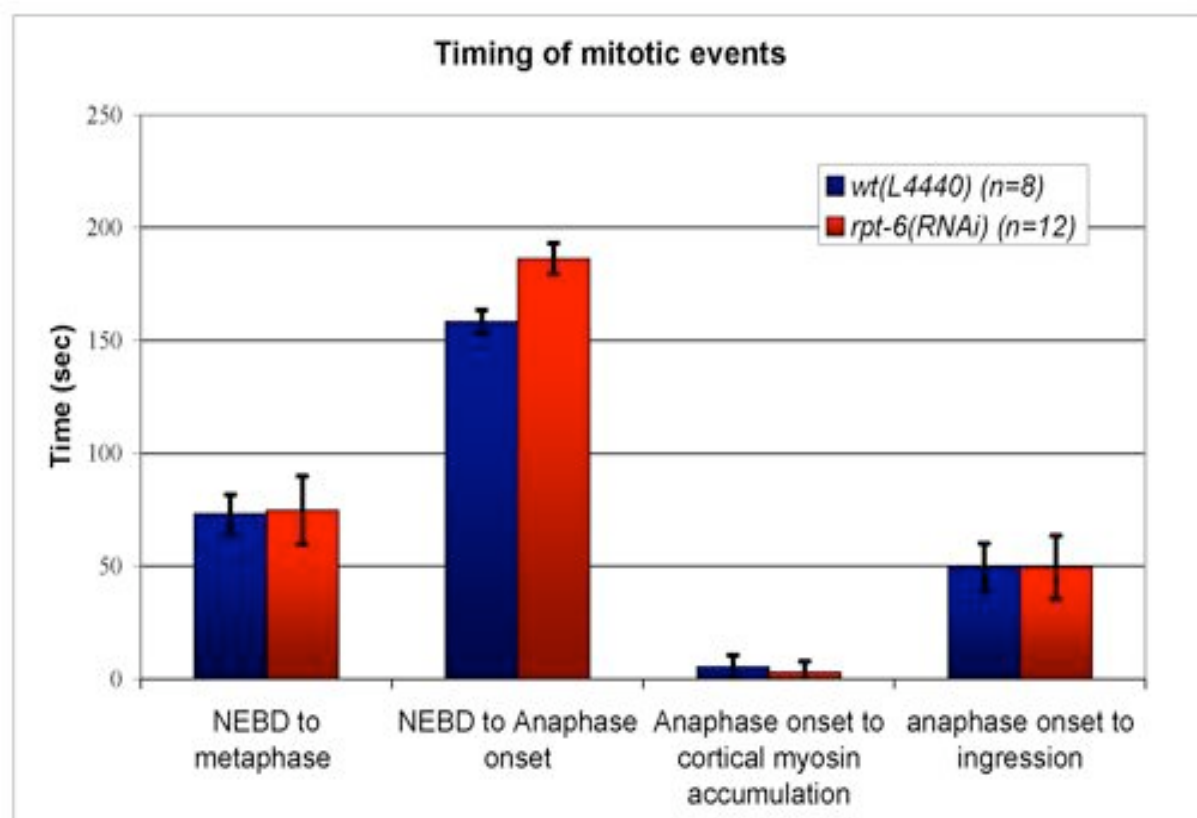

B

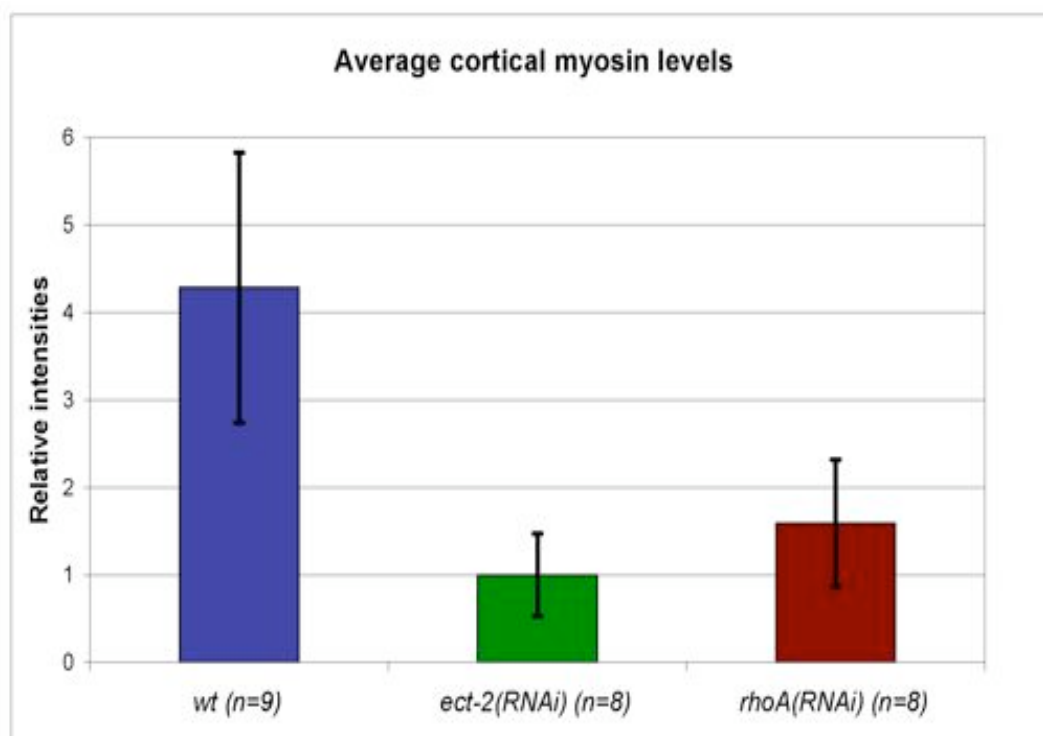

Supplemental Fig. 1

A

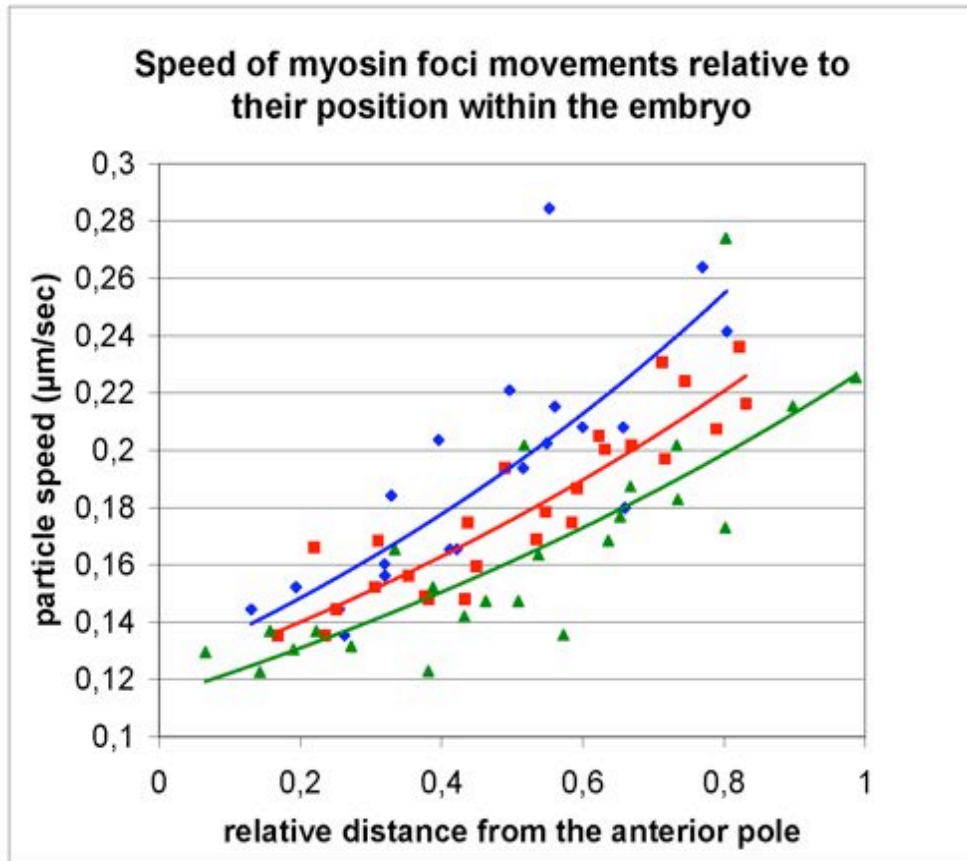

B

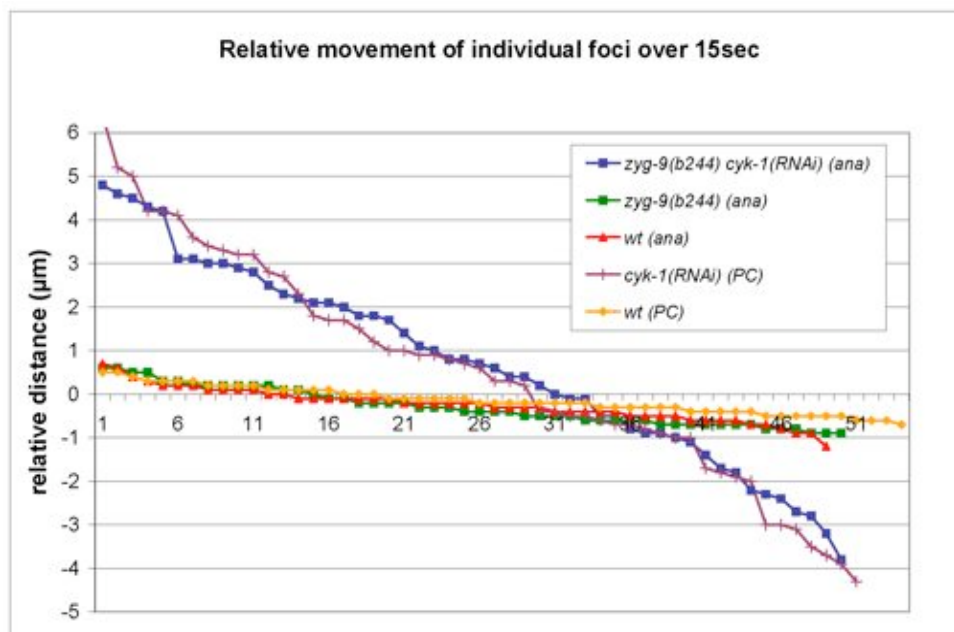

Supplemental Fig. 2

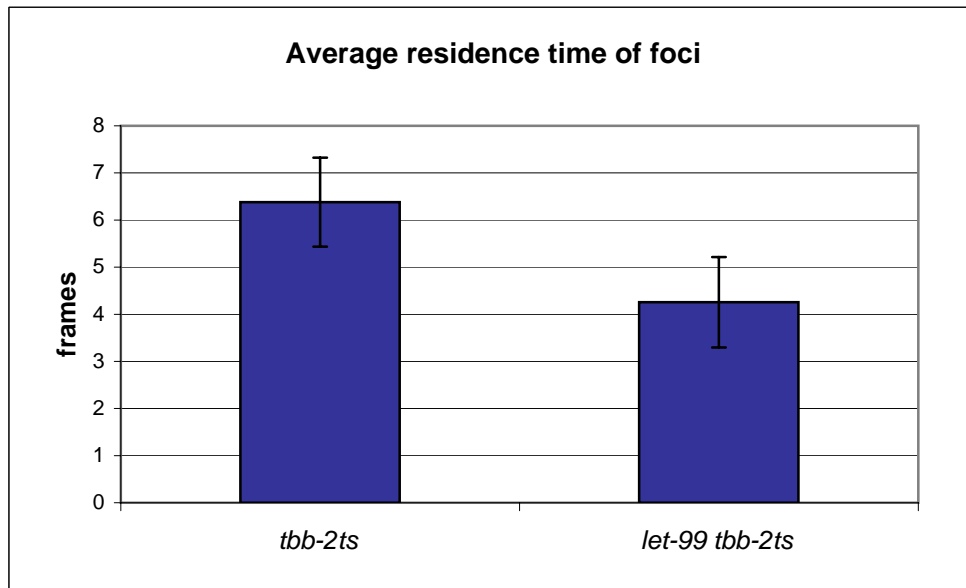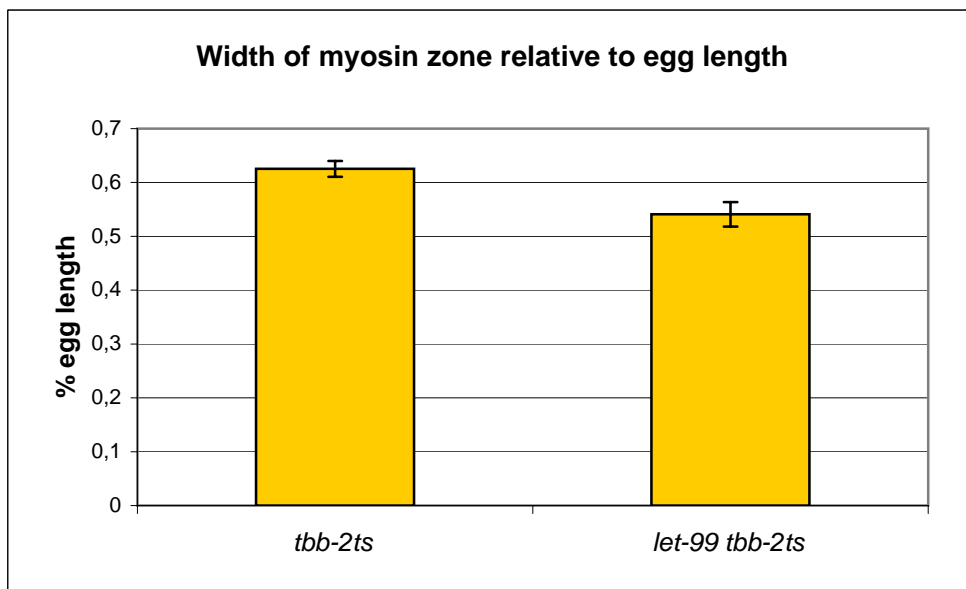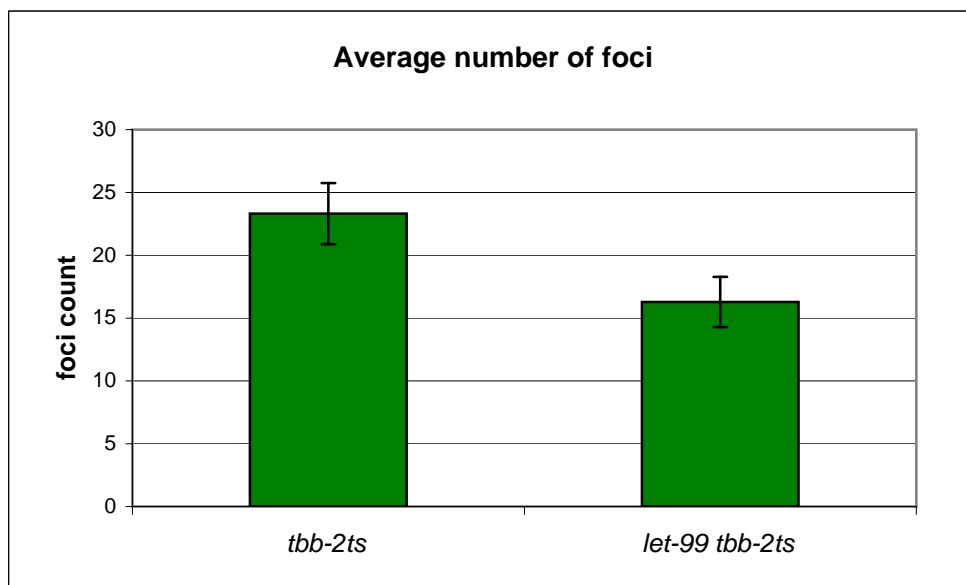

Supplement: NIHMS28504-supplement-01.pdf [file NIHMS28504-supplement-01.pdf]
